# Supplementary material
Source: publisher site journal article supplement (https://www.spandidos-publications.com/3308/downloadSupplementary)
Supplement: Supplementary file 1 [file downloadSupplementary]

## Sheet: miR-106a-5p
Data S1. Target genes (miR-106a-5p).
ENPP5
GPR137C
FYCO1
DYNC1LI2
ZNFX1
NPAT
ARID4B
MED12L
TBC1D20
ZNF800
NPAS2
SAR1B
BRMS1L
ITGB8
ANKRD52
VLDLR
TXNIP
KCNB1
CLOCK
RUFY2
ARHGAP12
KCNK10
STK17B
PDCD1LG2
ZFYVE26
RAB22A
SLC40A1
REEP3
RRAGD
TBC1D9
CFL2
PTPN4
AAK1
SACS
PKD2
ZNF827
MAP3K2
NAPEPLD
EPHA4
FAM45A
EPHA5
GPR6
E2F1
AKTIP
FCHO2
USP46
NFAT5
C2CD2
RNF128
EZH1
RGL1
MKRN1
ITPRIPL2
ZNF367
PLEKHA3
ANKIB1
REST
KLHL28
KIAA0513
FBXL5
NCOA3
CCND1
USP3
FRMD6
VANGL1
ZFYVE9
RPS6KA5
ATXN1L
ATG16L1
LRIG1
ZBTB4
SAMD12
HSPA8
RASGRF2
ELK4
BCL11B
NABP1
GLIS3
KMT2B
ZNF512B
FSD1L
VASH2
RBL2
STXBP5
FAM126B
CMTR2
TNFRSF21
TGFBR2
MYT1L
SEMA7A
ZFP91
HS3ST5
BNIP2
SPRED1
ATAD2
ITGA4
PHC3
FAM129A
DPYSL5
USP31
ZNF652
ZNF704
LAPTM4A
EIF5A2
FOXJ3
TET3
FRS2
FJX1
NR2C2
GAB1
ANKRD29
ZC3H12C
ARID4A
KAT2B
ZBTB41
U2SURP
GPR63
NCKAP5
UBXN2A
FAM117B
SALL3
LAMA3
ZBTB7A
CEP97
B3GALT2
TRIP10
SALL1
GXYLT1
LPGAT1
F3
SPOPL
E2F5
ZXDA
SERTAD2
FGD4
PRRG1
ANKRD33B
PEX5L
FGD5
PTHLH
TRIM36
CHRM2
EGLN3
PURB
SLC24A2
UEVLD
EFCAB14
PPP6C
HAS2
LIMK1
RORA
LIMA1
EPHA7
SLC46A3
MASTL
PDE3B
PTPRD
PGM2L1
SLC17A7
37104
UBE2Q2
RASD1
RAB11FIP5
PFKP
IRF9
FAT2
BTG3
BBX
SSH1
FBXO48
SOS1
RASL11B
SNTB2
PRDM6
TRIP11
MKNK2
VSX1
ARMC8
TOPORS
ZBTB20
CLIP4
KMT2A
FZD3
RORC
BMPR2
TMEM127
ABCA1
NEDD4L
IQSEC2
DCBLD2
DUSP2
ANKFY1
ANKH
DRD1
KIF3B
BNC2
HEG1
RAB5B
NKIRAS1
NIN
ARHGAP26
LDLRAP1
GPR137B
DNAJC27
NAGK
SLITRK3
MAP3K9
ADAM9
TMEM168
PCDHA8
PCDHAC1
L3MBTL3
CCNG2
TAOK3
DDHD1
PPP1R15B
ANKRD17
PCDHAC2
PCDHA13
RRM2
DNAJC16
ATL3
HBP1
PCDHA10
HPS5
PCDHA5
IGSF10
XRN1
RACGAP1
URI1
ANO6
PCDHA6
PCDHA11
KLHL2
PCDHA3
PTPN3
LASP1
OCRL
SUCO
RAP2C
ACSL4
PCDHA4
SRCIN1
PCDHA1
BRWD1
ELK3
CEP120
PCDHA7
PCDHA2
PCDHA12
RAPH1
SEMA4B
PPP1R3B
NTN4
BTBD10
RB1CC1
ARHGAP1
TET1
DENND5B
SCN1A
CSRNP3
MAPRE3
CD69
ULK1
RUNX3
NBEA
FAM102A
DAB2
USP28
CROT
TNKS2
CENPQ
RAB11FIP1
SESN3
WDFY3
AMER2
NRIP3
TIAM1
SLAIN2
HAUS8
LDLR
THRA
LRRC55
SMOC1
FAM189A1
LRP8
LRCH1
SLC33A1
ENTPD4
S1PR1
GNB5
CCDC71L
GOLGA1
ETV1
YOD1
TRPV6
EGR2
AP2B1
C7orf43
MAPK1
MTMR3
CREB1
CAPRIN2
NACC2
CMKLR1
APCDD1
FAM219B
NAA30
KPNA2
RGMB
HECTD2
PRR15
PLXDC2
MEX3D
ARHGEF11
CALD1
SSX2IP
DPYSL2
STRIP2
UBE3C
OSTM1
DERL2
APP
CYBRD1
ABL2
ROCK2
IRF1
ZFAND4
TMEM64
ZBTB18
LHX6
CHD5
SLC16A6
BTBD7
ZBTB33
IL1RAP
RPS6KA4
TNFAIP1
SMOC2
CC2D1A
SRGAP1
LYST
TNKS1BP1
CERCAM
UNC80
KLHL15
ST6GALNAC6
PITPNA
PANX2
FAM19A1
PGBD5
KLF11
UNKL
PXK
ERC1
OSM
FNBP1L
HTR2A
SMAD5
TRIM3
PIK3R1
CRYBG3
SFMBT1
WNK3
WDR37
SLC16A9
RLIM
OSR1
STK38
SLC22A23
GOSR1
FBXO31
OTUD4
OXR1
PLAGL2
SNX8
FAM13A
AKAP11
STAT3
ARHGEF10
ZNF202
PHIP
HIF1A
ISM2
CREB5
FNDC3B
DNAL1
CD274
ORMDL3
EREG
MIDN
CNOT7
FEM1C
SH3PXD2A
BAHD1
ST3GAL1
USP32
ZNF148
ANKRD50
ZNF236
PPP1R21
CEP170
RAPGEFL1
TGFB1I1
BICC1
MFAP3L
SEPT2
PLXNA1
KIF23
SOX4
ABI1
RAB10
CRY2
ANKRD13C
TSG101
FAT4
PDGFRA
ARHGEF18
TANC1
MINK1
CMPK1
DOCK4
AGFG2
SQSTM1
RBBP7
LMO3
SGTB
ABCG4
FAM210A
PARD6B
RAB8B
IL6ST
TPRG1L
WEE1
MCL1
FBXL3
GNS
FAM199X
C14orf28
MAP3K8
SCAMP5
PLAG1
TSPAN9
RNF6
CORO2B
REV3L
FBXO21
ABHD5
MYLIP
UXS1
UNK
ZBTB8A
WDFY2
ARAP2
MAPK4
LYPD6
TMEM100
RGMA
PSD
KIF26B
MMP24
NUP35
REPS2
LCOR
PBX3
WFS1
TMX3
FOXK2
ATXN7L1
ATXN1
MFN2
FASTK
SOCS6
RAB12
TBC1D8B
TMEM167A
TENM1
BHLHE41
PTPN21
BICD2
SYTL4
AKAP13
DUSP8
ARHGEF3
RHOC
PRR16
NEUROG1
TAGAP
MAP7
SCN2B
TRIM37
PDLIM5
SH3BP5
ARHGEF28
DDX5
SRPK2
CTSA
CAPN15
NFIC
ZDHHC1
PFKFB3
ZHX2
MYNN
FLT1
SNX16
KCNJ10
C2orf69
MCF2L
ZBTB21
HLF
MARCH8
RBL1
SCAMP2
STK11
CDC23
ZFPM2
ATG2B
SERP1
PLCB1
CNOT6L
CDC37L1
CDKN1A
USP6
PTPDC1
NFIB
ZDHHC9
KATNAL1
SORL1
PRR14L
DNAJB9
MMP2
NTNG1
NANOS1
USP24
NEUROG2
SPTY2D1
ZNF280B
MYO5B
ZNF25
NPLOC4
SAMD8
TMBIM6
MTF1
ABHD2
ZNF597
GABBR2
KLF9
SLC4A4
RPS6KA6
PPP3R1
AHNAK
RAB30
KLF12
NDEL1
ZBTB9
NPAS3
TP73
FAM13C
CPEB3
NHLRC3
PKD1
FAM3C
RNF217
STYX
ZNF2
SLC30A7
SS18L1
JAK1
ATG14
SLC41A1
SCN2A
LZIC
SLC45A4
AKT3
TAOK1
BCL2L11
KIAA1522
PTGDR
VASP
BAMBI
SPRY4
TWF1
KPNA3
OSBPL5
ZBTB47
IKZF4
CXCL14
PPARA
PAFAH1B1
PHLPP2
ZNF362
ITCH
MYO1D
FEM1B
C6orf120
C3orf70
TBC1D15
ESR1
ERI1
PAF1
GBF1
SMIM14
NR4A3
MARCH6
CIT
EEA1
PTGFRN
CHAF1A
APBB2
PAFAH1B2
PLEKHO2
POLR3G
ST6GALNAC3
CELSR2
COX7A2L
M6PR
SHANK2
SLITRK2
NEURL1B
ACBD5
EIF4G2
FAM117A
SOWAHC
E2F2
PHTF2
RB1
C3orf38
C16orf70
CRIM1
SUMF1
HMGA2
HOOK3
RASA2
CRIPT
CREBRF
BTG2
TMEM50B
KDM2A
GIGYF1
STX6
TUSC2
ATP1A2
JAZF1
ARSJ
KLHL20
PGP
NRBP1
ARL4C
DSG4
ATG7
PREX1
PON2
PLS1
FRMD4B
PPP6R2
RABEP1
ST8SIA2
RAPGEF4
RNF2
MAPRE1
KIF5A
RASGEF1A
KLF10
CCSER2
CRK
MAP3K12
SHOC2
TXLNA
NR4A2
ALX4
UBE2J1
TMEM25
TBC1D17
IL25
LRP1B
IPO9
DOK6
ZNF805
ZADH2
RPS6KA1
PKN2
COX8C
SESN2
GPC6
PRRX1
PFN2
CAMK2N2
TSHZ3
RNF38
LHX8
GID4
ZBTB6
UBE2B
SLC29A2
TADA2B
HMGB3
CACUL1
SH2D5
PTPRJ
EGLN1
POLQ
COL4A3
TP53INP1
MAT2B
RNF13
ITFG1
PURA
PDPR
GGCX
HP1BP3
FMNL3
PCMTD1
MAP3K5
HMBOX1
CADM2
LIF
CSGALNACT1
ITPKB
SASH1
ZC3H7B
BECN1
EPGN
ZNF217
SNTG1
DCUN1D3
TIMP2
LRRC20
CHD9
SMAD7
TBC1D2
YPEL2
SOBP
INO80
SNX21
GMCL1
HCN4
THBS2
PLSCR4
DGKH
ISM1
SLC25A36
CDCA7
STK11IP
BMP2
TSC22D2
FURIN
ACIN1
KLHL36
COL4A1
YPEL4
CYB561D1
ARHGAP35
NEK9
SRGAP3
SFXN5
RSBN1
CYP26B1
PEAK1
RASSF2
RAB11FIP4
E2F3
FAM129B
MCC
AP3D1
ZRANB1
KIAA1147
MPDZ
IGF2BP1
SIK1
EPHB4
CEP128
PRRG4
VEGFA
TCF7L1
SLC6A9
METAP1
NETO2
ASXL3
PPP6R3
ZNF532
TNFSF11
CDH24
PANK3
TRIM8
LUZP1
DMRTA2
NOL4
TBX3
TTC39C
PKNOX1
PPP2R2A
KMT2C
TTPAL
MID1
KPNA4
PKIA
MAP3K1
CABLES1
TNRC6B
PRDM10
TNS1
BCR
AK4
YTHDF3
UBR5
CERS6
MECP2
CCL1
CCND2
RND3
FRMD4A
MED17
SLC35F3
FGF5
TMTC1
CAMTA2
DAZAP2
YES1
ADAMTS5
CHIC1
TMEM123
SLC2A4
HECA
SMAD1
TNRC6C
IPMK
RBMS1
PDK3
WNK1
NPM1
SLC24A4
LAMP5
IL17RD
FGD1
TBL1X
MKLN1
WNT9B
ARL1
FXR1
MXD1
PPM1A
GALNT10
NUFIP2
AJUBA
RGS4
GDF11
DEDD
NAV2
COQ2
HDAC4
PIP4K2A
EDA2R
DIP2A
SULF1
TBCEL
FOXA1
MXI1
MYCN
COL19A1
SLC11A1
SIRPA
SDC2
FGF4
NRSN1
SKI
PHF1
UBASH3B
SEMA5A
TLE4
ERBB3
CYP2U1
SLC36A1
KIAA1671
FNDC3A
AFF4
TMUB2
STC1
XRRA1
SLC5A3
VPS26A
ACTR1A
GIT2
SLC25A27
SLC39A6
EIF4H
PCDHA9
FIBIN
TANC2
CNN1
FOXL2
FNBP4
SMAD6
TMCC1
TCF4
EXPH5
SNX12
RPS6KA2
FBXO28
IPO7
CDC40
RARB
ATE1
RCOR1
C16orf72
MAST3
GJA1
INTS6
MCM3
TRAPPC10
UBE2W
IQSEC1
AHRR
ELAVL2
TMEM132B
UBASH3A
MAP3K3
SNX9
FOXJ2
SP8
MYCL
AFF1
DSTYK
CTDSPL2
PPARD
FAF2
CAMK2N1
FAM168A
USP53
PLEKHM1
AEN
RNF145
NCEH1
IPCEF1
ZDHHC8
XIAP
MBD5
TSKU
FGF12
KLF3
OTUD1
ZNF385A
CNGB3
MSMO1

## Sheet: miR-103a-3p
S1 - Target genes (miR-103a-3p)
DICER1
SCN8A
AGFG1
KIF21A
NPAS3
MED26
ANO3
TWF1
FBXW7
TRIAP1
ATP13A3
SNRK
AXIN2
AMMECR1
N4BP1
CLOCK
RBM24
JAKMIP2
CLIP1
CPEB3
RIMS3
MYH9
NUP50
PLEKHA1
KIF23
TNRC6B
MEF2D
PPIP5K2
AMOT
IARS
NF1
PPP6R2
RNF38
FOXP1
ARMC1
SCN2A
PTPN4
ZBTB10
ELK4
ACVR2B
USP42
ZHX1
PLEKHF2
HERC2
SPATS2L
ZCCHC2
MYCN
38200
GPC6
PAFAH1B2
NDEL1
PCGF2
FERMT2
NEDD9
SUN2
ANK3
IGSF3
CHD2
SLITRK1
EVA1A
CACNA2D1
BTRC
UNC80
PDZD8
PTH
KLF4
TGFBR3
PPP2R3C
PPP6C
SIX4
PGRMC2
DYRK2
GPCPD1
CAB39
TRIM71
EIF5
PHYHIPL
PAG1
PRKG1
SMARCE1
CCNYL1
TDG
SNX12
KIF5C
PDE3B
NUDCD2
ASH1L
SH3BP4
ZNRF2
ZNF449
STRN
GGA3
TMEM47
EDIL3
CCDC50
ARIH2
SLC25A37
TBKBP1
SBNO1
MAPK8
FAM98A
GSKIP
CSNK1G2
GALNT7
HTT
CC2D1B
SLAIN2
ZFPM2
SEPT6
DYNC1LI2
THOC2
UBE4A
PRR14L
CELSR2
ZBTB39
FAM81A
UBE2R2
G3BP2
CNNM2
RAI14
SREK1
SALL1
ROR1
MFN2
CDK6
BACH2
ABL2
CUL4A
PDS5A
GABRG2
FEZF1
MTFR1L
AK2
VAV3
PPM1E
TNPO1
37104
RAB1B
PDCD10
RUNX1T1
RORA
NFIA
DLG5
DLL1
VCAN
PRRT2
PRKCE
BCAT2
CORO2B
WNK1
YTHDC1
PURB
CEP85L
FLOT2
LATS2
ARL8A
OSBPL6
C2CD5
AKIRIN2
CSNK1G3
NSG1
TSHZ2
GPATCH8
SYDE2
PLCB1
SMS
ATP1B2
KATNBL1
ARIH1
TMEM260
ANKFY1
NPAS2
ARMC8
BTLA
KIF5A
GPR6
FAF2
HIC2
PRPF4B
MARCH3
COBLL1
DCUN1D3
SRGAP1
RRAGC
EIF4B
SNX3
FGF2
ESR1
ATXN7L1
FAT4
IHH
CCDC6
GIT2
NOVA1
MBNL1
RAB11FIP2
PHF20
SLC20A2
DSC3
LRP2
PABPC1L
OGT
ANK1
CNTNAP1
ARHGAP5
MIF4GD
CAPZA2
MTMR4
MYBL1
CTNND1
TSPAN5
UPF2
PAWR
TAOK3
GNPNAT1
POLDIP2
ZC3H7B
ADCYAP1
ACOX1
PDIK1L
UBR4
DCBLD2
FAM110C
NR2C2
RC3H1
PITPNA
PDE8B
NR4A3
RSPO3
KIF1B
SLC44A1
PPP3R1
CHD1
ABHD2
RAB10
ARHGAP19
MTMR3
UBR3
PRKAB2
RAB40AL
DCP1A
RNF125
TRAF3
SALL4
GREM2
YWHAH
RPUSD1
NOS1
WNT3A
HMGA2
FGF7
NAA20
NFAT5
SCN1A
GNS
APBA1
SATB2
IRF2BP2
WWP1
EDA
OTUD4
DNAJB4
FOXJ2
SLC45A4
SNCG
LCOR
VCL
BTG2
GATAD2B
SLC2A14
GPR12
RAB30
ANKIB1
CHIC1
CDK14
HELZ
SLC2A3
MBNL3
NAA15
PIK3R1
SOX6
TPD52
UBL3
EN2
ATXN1L
FBXL18
KLF7
PACSIN1
LRP1B
VAMP1
SIPA1L2
TGIF2
PAK3
SEMA6A
PHF5A
KPNA1
RASSF8
CDK8
SNX18
PALM2-AKAP2
AKAP2
SLC35A3
SPRY2
REST
BAZ2A
RAP2C
RNF157
UBE2Q1
SGMS2
SV2C
CALU
ATXN1
ERLIN1
EBF1
DUS1L
UGGT1
RBAK
ADAMTSL3
DNAJC3
PSMF1
SETD5
VPS4A
TLK1
DESI1
ENTPD4
FURIN
ACTG1
ZC3H12C
GATAD2A
FBXL20
MSI2
CHD6
SVEP1
ST3GAL2
STAMBPL1
UBE2J1
PDE4D
CDC37L1
PDK4
CAMKK1
DKK1
FAM117B
AFF4
CACNA1C
CHST11
RYBP
C16orf72
ZMYM2
LIN28A
ENPP2
VAMP8
MCFD2
ETNK1
SLC35G1
THSD7A
RASSF5
RCAN1
BDNF
SCAMP5
TM7SF3
STRIP1
HAUS5
TRABD2B
AVL9
CCNJ
MMS19
TLE4
LONRF1
SYNDIG1
KIF3B
KAT7
TJP1
FAM189B
CARM1
YAF2
GABRB1
CRELD1
ENTPD7
TBC1D19
THY1
ARID4A
KCND1
FAM104A
SUZ12
HMGA1
SPRY3
TTLL7
TGM3
MBNL2
SIK2
ARHGAP17
BCL2L13
PCDH17
CAMK2G
GALNT13
PPIL4
SEPT5
SEC22C
CHRM1
BAZ2B
WNT16
UMOD
ST8SIA3
PPP2R5C
ZNF711
FUCA2
NFIB
NAV2
ASIC1
GLRA2
SOWAHC
SDCBP
ZNRF3
LARP4B
SCAF8
FRYL
ATL2
NRIP1
STAG1
SH3BP5
GRIN2A
TBPL1
HOXD10
BLMH
ACER3
PDK3
BOLA3
KPNA3
APPL1
GSTCD
KANK4
AQP11
RAN
DPP8
LRRC15
UHMK1
NR1D2
ETF1

## Sheet: miR-29a-3p
S1 - Target genes (miR-29a-3p)
COL1A1
TET3
TET1
PI15
TET2
ATAD2B
HRK
COL3A1
ELN
TRIB2
XKR6
COL1A2
NFIA
EIF4E2
TIMM8B
HBP1
TDG
IFI30
COL11A1
C1QTNF6
ADAMTS9
ADAMTS2
COL2A1
LYSMD1
COL5A3
SMIM17
IREB2
YPEL2
NASP
COL4A5
SLC22A7
COL4A1
TMEM169
SPARC
ZKSCAN4
SLC30A3
PMP22
SYPL2
SMTNL2
TPK1
DTWD2
TMEM236
PPIC
ZBTB34
GPR37
ENHO
PCSK5
ICOS
HIF3A
ADAMTS17
REV3L
COL5A2
TAF11
COL4A4
COL21A1
COL7A1
COL9A1
CCSAP
GPATCH2
ARRDC3
MPZL3
FBN1
CDC42
PGAP2
TSPAN14
SESTD1
SS18L1
LOXL2
TMEM183A
HAPLN3
ZBTB5
CDC7
MLIP
GSTA4
MEX3B
ZNF282
COL19A1
YBX3
ISG20L2
HAS3
COMMD2
NAV1
TRAF4
SH3BP5L
NREP
ZFP36L1
PTEN
RNF39
CBX6
KDELC1
ELOVL4
ASXL3
PXDN
GRIP1
FEM1B
WDFY1
AGPAT4
CLEC2L
KCTD5
ADAMTS10
FAM167A
SMS
FAM57B
NAV3
FAM13B
SLC5A8
REL
DYNLT1
TFEB
RNF19A
KCTD20
LAMA2
PAN2
C16orf72
PDIK1L
ARF5
SHPRH
VASH1
GPX7
LSM11
KLHL28
FOXJ2
MYBL2
NUDT11
VPS37C
NAPB
ENTPD7
ROBO1
FRAT2
ABCB6
SNIP1
NCKAP5
BMF
SGK1
TNFRSF1A
TFAP2C
SGMS2
DNMT3B
COL15A1
MBTD1
SLC36A1
NPM3
ZKSCAN3
SLC16A14
FOXO3
CNR1
PDGFC
EFNA5
KIAA0895
VEGFA
ZNF366
CCDC117
TMEM178B
CHFR
ID1
HS3ST3B1
MFAP3
CAV2
NPAS3
COL27A1
MYCN
FAM3C
BAK1
N4BP2L1
CRISPLD1
TRIM63
KLHL8
SLC6A14
SRSF10
FSTL1
TUBB2A
CDK6
COL5A1
ADAMTS7
GNG12
TMOD3
DCAF12L1
TNFAIP3
AMMECR1L
SOX12
CCNJ
KCTD3
COL6A3
ETV4
TUBD1
HMGN3
ANKRD13B
HMCN1
DCX
BLMH
TLL1
RAB30
MCL1
SNX24
PHLDB3
C11orf87
BTG2
OSTC
HOOK3
PTP4A1
MLF1
PPP1R3D
KIAA0355
COL22A1
DGKD
NANOS1
BRWD3
TTC30B
ABCE1
HDAC4
CSGALNACT2
CPS1
C5orf15
DCP2
ZNF469
RAB15
FBXW9
ZBTB47
ADAMTS18
ELF2
CCNYL1
KIF26A
CACNA1A
ZSCAN25
DOLPP1
SCAMP5
CHIC2
WASF1
F11R
PLEKHF2
TAF5
STX16
DGKH
PRR3
CCNL2
PIK3R1
R3HDM4
IFFO1
NRSN1
LASP1
JAZF1
DDX3Y
CACFD1
AAR2
CMPK1
FAM193B
AMOT
LIF
RAPGEFL1
PDHX
FERMT2
PCYT1B
DPYSL5
CLK2
CPEB3
AMER1
SIRT1
NKIRAS2
IL1RAP
NDN
USP34
FBXW7
ITGB1
CDCA4
SETDB2
ZNF512B
EML6
PARG
CCND2
CAMK2G
LPL
MAFB
MARCH1
GGCT
ABHD5
OTUD4
RARB
DCUN1D4
SERPINH1
GRAP2
TFEC
RNF138
ZNF518B
MED12L
NID1
GLIS2
37104
NKRF
PLEKHA8
RAP1GDS1
UBTF
PALM
PPM1D
ERC1
SH3PXD2A
ISL1
REST
ARL4A
VASH2
SIDT2
DOT1L
HNF4G
PCGF3
SETDB1
TP53INP2
EPC1
CILP2
H2AFY
INSIG1
COL4A2
MAPRE2
TMTC3
CD276
FREM2
PRKAB2
FOS
MAU2
ZC4H2
SMPD3
DNAJB11
C1orf226
RAB12
C9orf72
UBFD1
PIK3R3
HMGCR
CPSF7
COL6A2
KDM5B
JARID2
CTDSPL2
CALM3
RERE
KLF4
POLE3
ZBTB10
SENP1
DCLK3
HMGCS1
EOMES
DCAF12
MAFG
N4BP2
BACH2
AKT3
EHD2
CHSY1
CLCN5
DENND6A
SOWAHC
SAMD4A
LARP4B
PRRC2C
TMEM65
WBP1L
RIT1
SLC2A3
UBE2H
ERLIN2
EIF3J
SPTAN1
CCNT2
CREB5
TCF4
SCHIP1
GPAM
XKR4
SH3RF3
METAP2
SESN1
P2RX5
GAB1
ZBTB46
EML5
CDC42SE1
BACE1
AKAP5
GID8
SCN3B
ENPP2
VHL
ADAM19
MEGF6
DAAM2
PPIP5K2
USP42
PLP1
UPK1B
CPM
STC1
PALM2
TRIM9
SIAH3
CNOT8
RCOR1
STX17
STRN4
CEP97
TNFAIP1
STAG2
MEST
KCNIP2
MOB1A
SLC16A1
KLHL25
HELZ
ATP2B4
PROM1
TUBB2B
RCC2
ADAM12
CBX5
IQCJ-SCHIP1
CTNNBIP1
B3GNT5
PLEKHA1
VCPKMT
PPP1R15B
FAM168B
TRAF5
VANGL1
FGD4
ANKRD52
CUEDC1
RFX7
KCTD15
SNRK
CELF2
HTR7
HAPLN1
GTPBP2
SIDT1
KLHDC3
COL4A3
CA3
E2F7
KIF26B
PPP1R13B
DTX4
POLR1D
PTBP3
PTPRK
ARVCF
MBD5
HTR6
ZMIZ1
PPM1E
TRAFD1
LDLRAD3
LAMTOR1
NCOA4
MXI1
PRKRA
GPCPD1
IFFO2
PEX5
ISLR2
BCL11B
ZBTB41
LOX
PLAG1
MTX3
KNOP1
PAPOLG
KDM4B
MAPK10
NDST1
MSTN
SIX5
CALCR
ELMSAN1
PRKG1
MED26
AKAP13
NOTCH2
ZFX
DPP4
ANKRD27
CX3CL1
INA
DLG2
SFXN3
EMP1
ZFP91
KIF5B
SPSB4
CTNND1
PRR14L
RUNX1T1
RASAL2
CDC42BPA
FKBP4
AP4E1
NLRX1
STRN
PCDH17
MTMR4
LOXL4
GNG2
NAA40
COL4A6
LAMC1
NUP160
PIK3CB
DNM3
AP1G1
VTA1
PER3
RORA
KDM5A
PAG1
OSBP
PDGFB
SLC43A2
FAM84B
SPAST
UNC13B
LEP
SUN1
NAV2
STAT3
PRICKLE2
AQP4
SVIL
WDR26
PHC1
ITGA6
LGI3
SLK
HLF
RHOBTB1
ITGA11
FRAS1
NEGR1
SH3GLB2
XKR7
HNRNPF
SDK1
LRP6
MAP4K4
PHACTR2
RYBP
TANC1
RAB40C
TMEM132A
KIAA1549L
CTPS1
OSBPL6
FRS2
IMPDH1
SLC7A6
STRN3
DIP2C
KPNB1
SPRY4
SERINC5
TRAK2
TRAF3
DRP2
HSPA4L
DNMT3A
HBEGF
AFF4
STARD8
CALU
RNF165
RBAK
C21orf91
ATRN
NCOA3
JMY
MGA
SPNS1
CHMP6
MAPKBP1
DSG3
NFIC
TIGD5
NFATC3
MIB1
GXYLT2
FREM1
VPS36
RALGPS1
KPNA1
PITPNM2
C5orf24
ANTXR2
KDM6B
PRPF40A
KBTBD8
KLF12
DAAM1
DPYSL3
NRAS
HECW1
PTPN4
DIO2
DPYSL2
EML4
ANKRD13C
TGFB2
CLDN1
IGF1
DCAF7
USP6NL
GSK3B
LDLRAP1
MXD1
RIC8A
TMEM33
SLC16A7
KIAA1549
TNRC18
LDLRAD4
COL6A6
NPAS4
CAMSAP2
BRWD1
NLGN3
BCORL1
ACTN2
SGCB
FBRS
OSBPL3
SAP30L
DDX6
MIER3
LIN7A
GRM4
JOSD1
IDE
ATP6V1A
CAND1
MMP24
ZMYM2
RMND5A
KDM2A
NFAT5
CAMK4
CACNA1B
ERCC6
TP53INP1
TTC9
KCTD1
PDP2
KIAA0895L
SKI
TADA2B
TMEM151B
SCAI
TENM3
ARFGEF2
SBF2
ARPP19
GRAMD1B
SLC2A14
PAIP2
ZMYM3
ARHGEF10
PLXNA1
STMN2
SCML2
DDX3X
BVES
PLXNC1
LMX1A
EPHB3
MAP3K2
USP37
RAP1A
ZBTB40
NSD1
MED28
GNB4
FBXL20
ZNF704
SCYL2
SP1
PROSER1
CCDC88A
SPEN
ARNT
ZER1
SHROOM2
MAP2K6
FRMD4A
COL25A1
ASAP2
PCDHA1
SH3PXD2B
MARK3
ILDR2
MLXIP
NUFIP2
RLF
MAPRE1
EDC3
CLMN
DDX46
INO80D
SEMA5B
GOLGA7
AP3M1
SLC31A1
PCDHA12
PCDHA7
PCDHA5
PCDHA8
PCDHA10
PCDHA11
PCDHA3
PCDHA2
PCDHA4
PCDHA9
PCDHA13
PCDHA6
ZHX3
PCDHAC1
PCDHAC2
CCNA2
REPS2
RNF217
SIKE1
RPS6KA3
GID4
LARP4
GAS7
ING2
ACVR2A
OTUB2
STK35
SMARCA2
CCSER2
ZDHHC21
DICER1
LIMS1
RRAS2
ARMC8
RAB3C
SH3GLB1
SOCS7
ZDHHC5
CACNA1C
CSRNP2
PGAP1
USP31
ETV6
PHF21A
HIP1
U2SURP
CFL2
PLCG2
ARID1B
ZFYVE26
UBTD2
AK1
TIAM1
RAB6B
ERP44
SPTY2D1
XPO4
UBE2K
MORF4L1
ATP1B4
KCNK10
FNDC5
ZBTB20
PLGLB2
KCNC2
PLGLB1
